# Supplementary material
Source: PubMed Central journal article supplement (PMC5502772)
Supplement: NIHMS871419-supplement-Supp_Fig_S1-3.pdf [file NIHMS871419-supplement-Supp_Fig_S1-3.pdf]

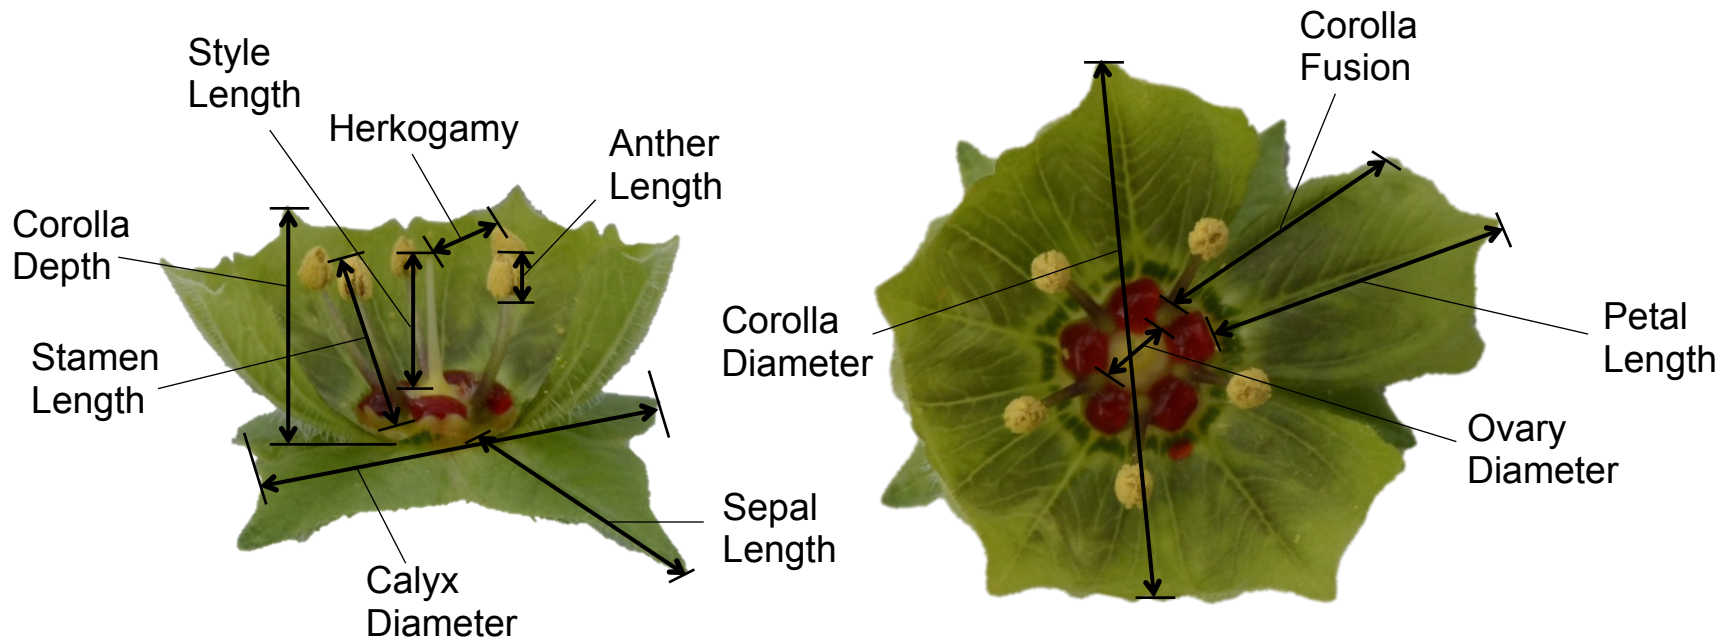

**Supplementary Figure 1.** Morphological traits measured on mature flowers. Floral organs were measured on 3 flowers per individual, for at least 3 individuals per species, using hand-held digital calipers to the nearest 0.01mm.

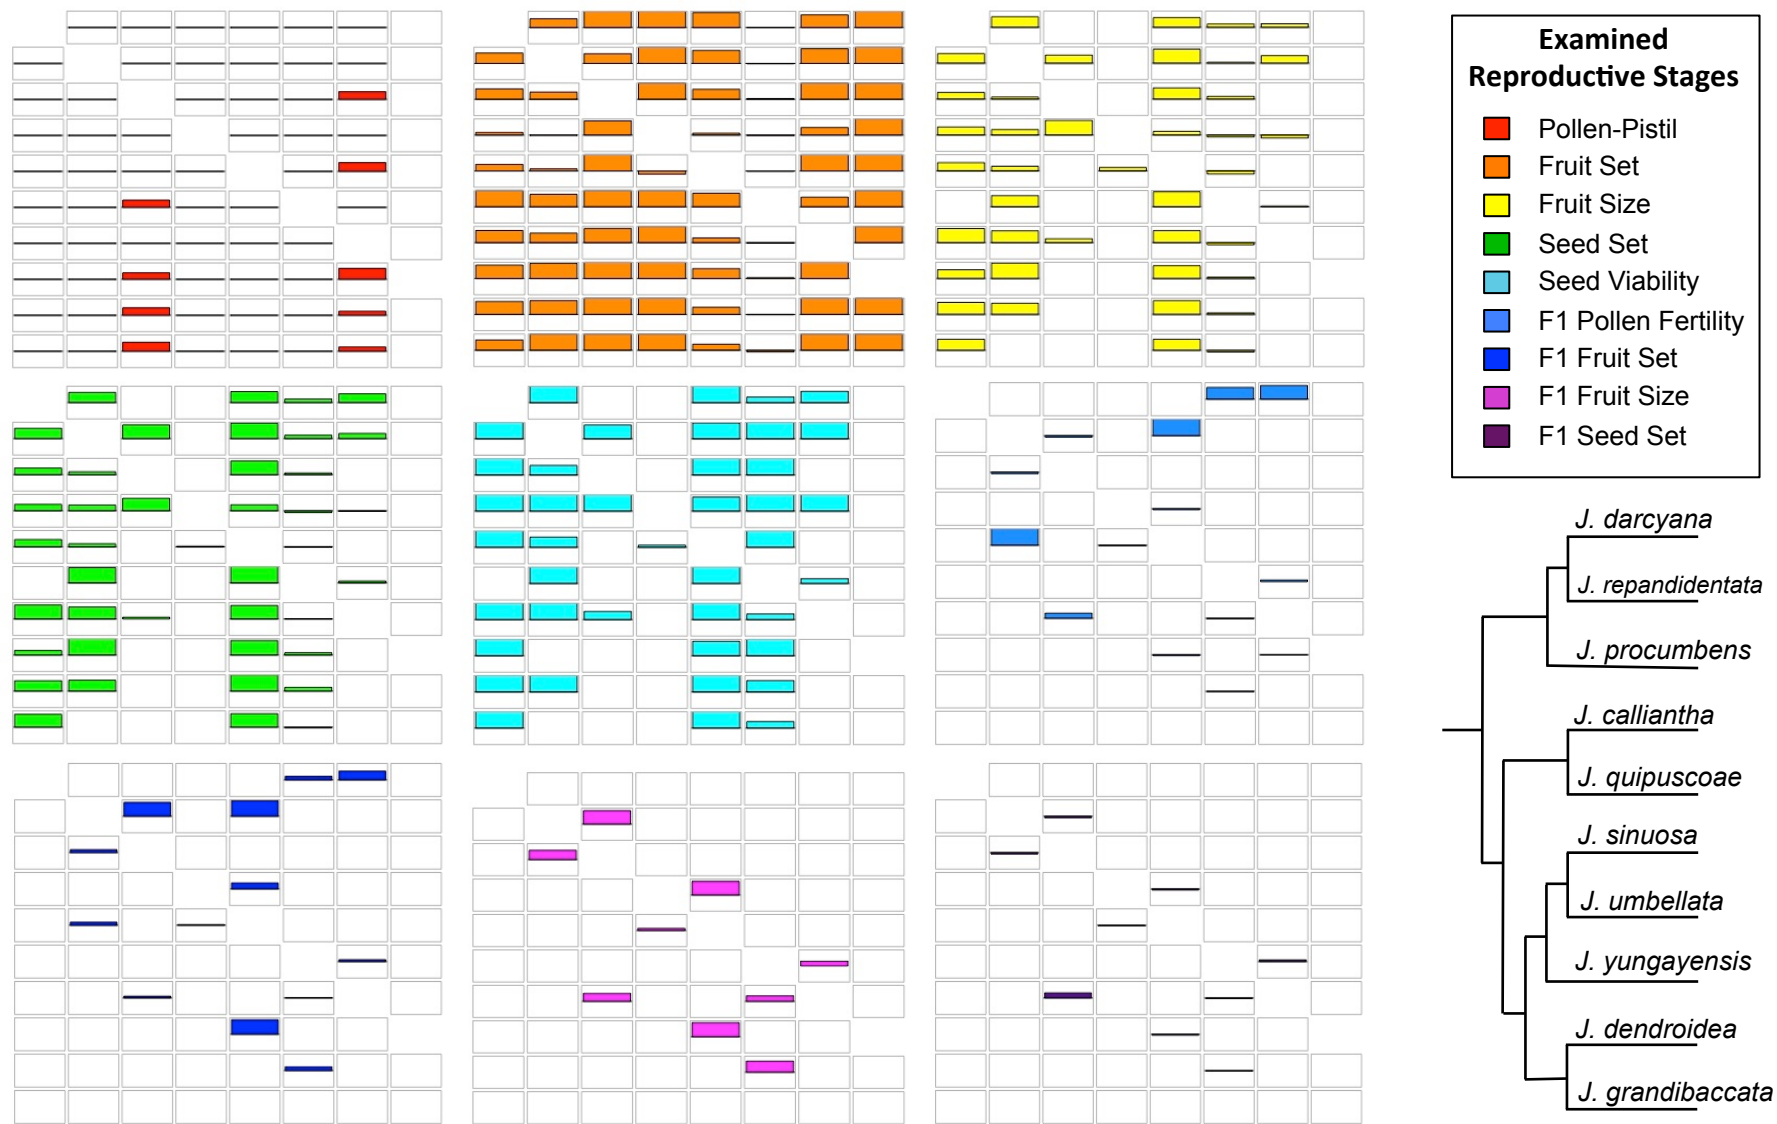

**Supplementary Figure 2.** Reproductive isolation for examined species combinations, across 9 postmating stages. For each stage, columns represent species acting as the mother while rows represent species acting as the father, arranged in phylogenetic order as shown in the inset cladogram. Blank cells indicate species pairs for which RI could not be calculated: intra-specific controls (diagonals) as well as later-acting stages when RI is complete at an earlier-acting stage. Cladogram based on the 60 transcripts used to estimate genetic distance (see Methods).

### Pollen-Pistil RI in *J. umbellata*

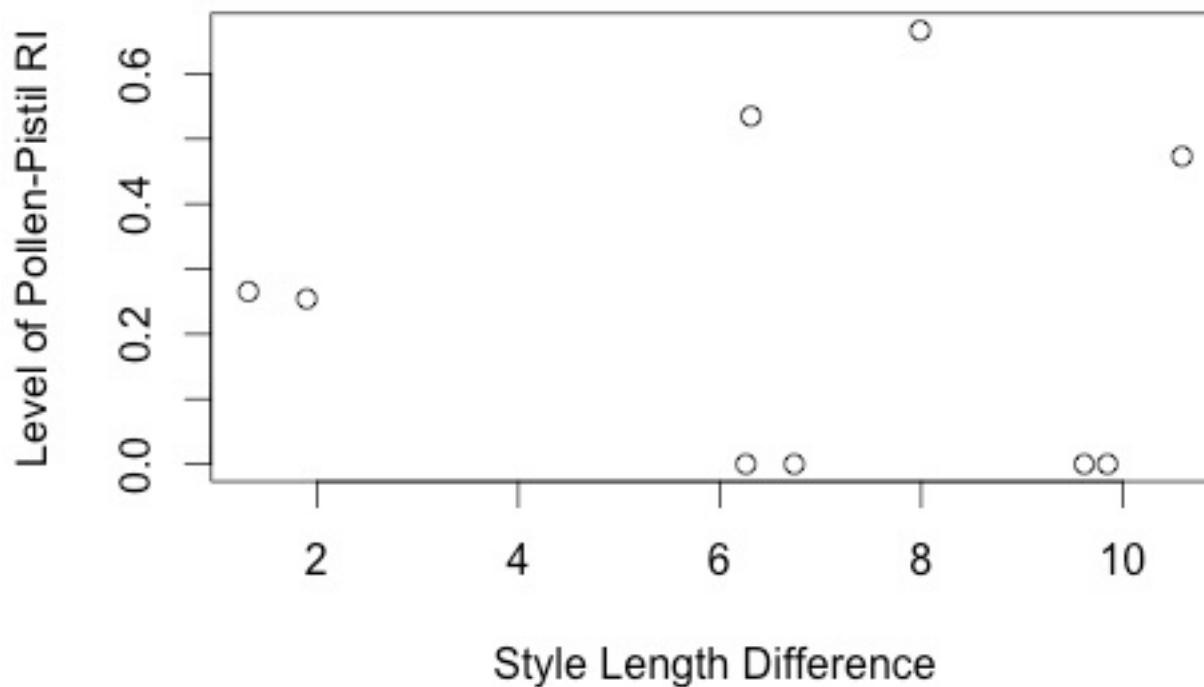

**Supplementary Figure 3.** Relationship between style length difference and pollen-pistil RI in species pairs that include *J. umbellata*.
